# Supplementary material
Source: PubMed Central journal article supplement (PMC5860860)

**Supplementary Figure S1.** Absolute numbers of total B, IBC, and IBC B<sub>ND</sub> cells

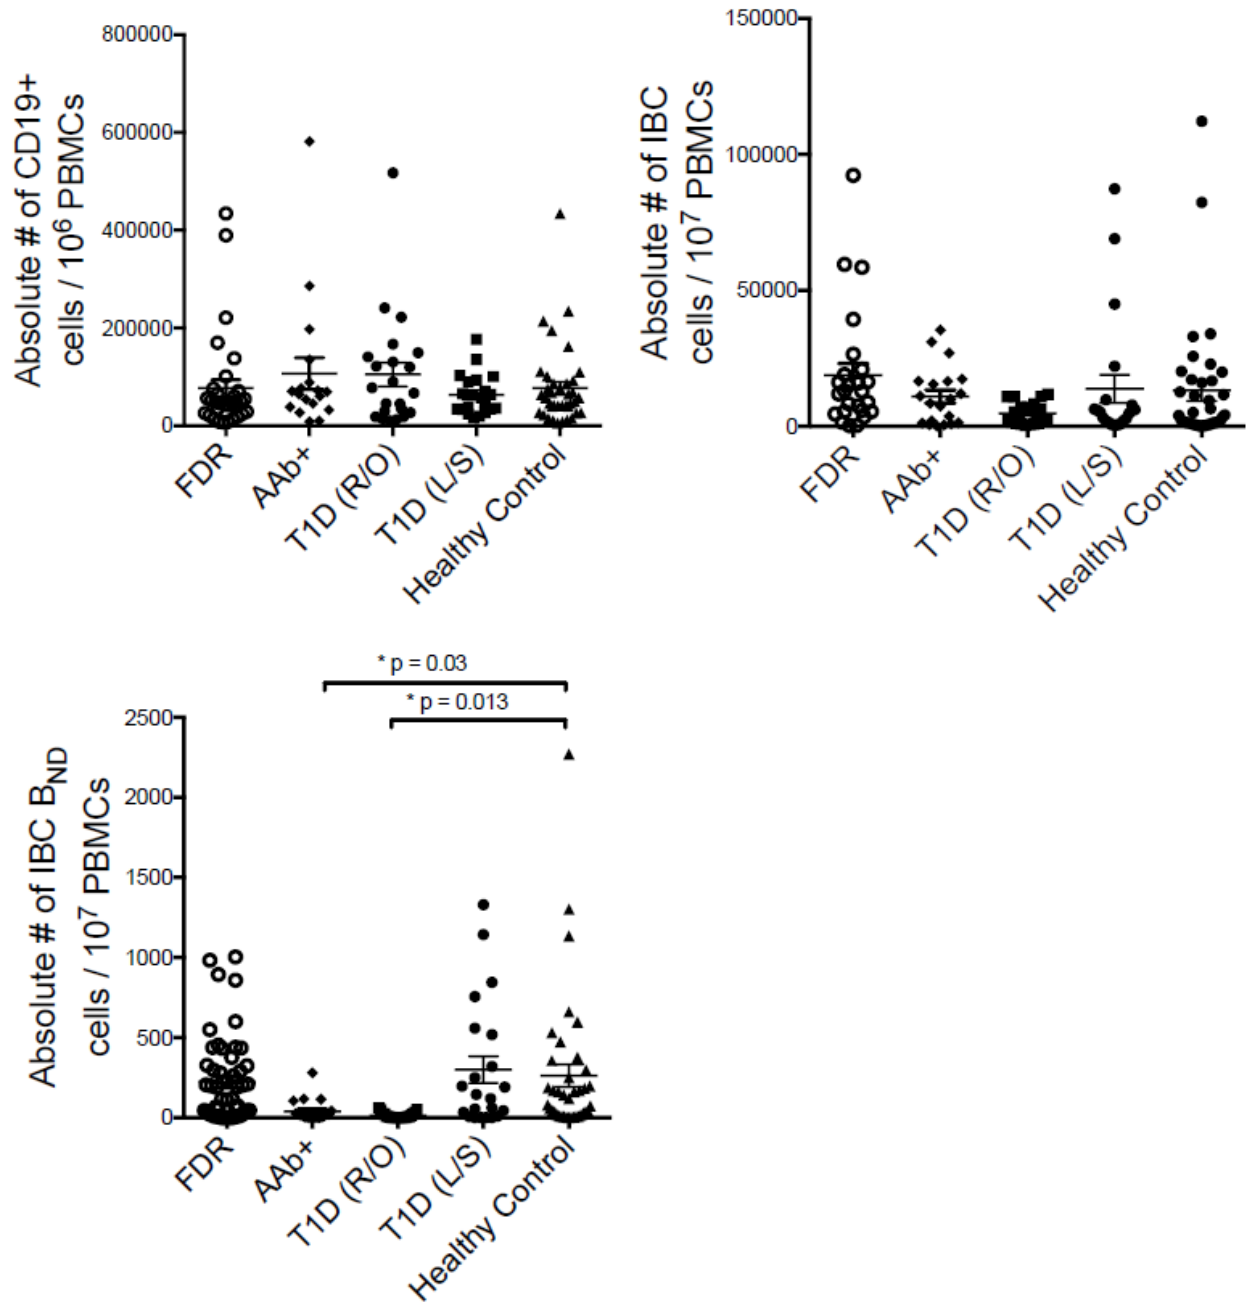

SUPPLEMENTARY DATA

**Supplementary Figure S2.** Decreased frequency of B<sub>ND</sub> cells is associated with decreased frequency of Treg cells in the peripheral blood of FDRs

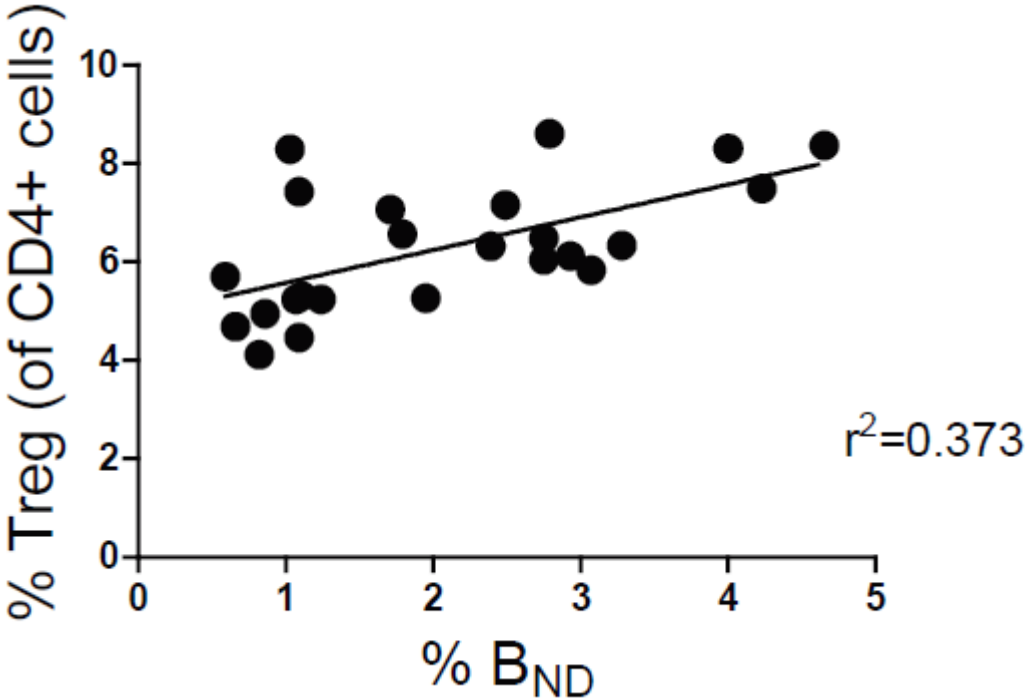

Supplement: DB170937SupplementaryData1.pdf [file DB170937SupplementaryData1.pdf]
